# Supplementary material
Source: PubMed Central journal article supplement (PMC4760219)
Supplement: MCB.00930-15_zmb999101133so1.pdf [file MCB.00930-15_zmb999101133so1.pdf]

1 **SUPPLEMENTARY LEGENDS**

2

3 **Supplementary Figure 1.** Low magnification scans showing pancreas sections with  
4 immunohistochemical insulin staining. Each picture represents a whole section of 14-  
5 month-old shown genotypes. Insets are magnifications of dashed areas.

6

7 **Supplementary Figure 2.** Tracing of *Men1* invalidation in pancreatic  $\beta$ *Men1* tumors.  
8 Representative result of Insulin (green), ChromograninA (red) and Menin (gray) triple-  
9 immunofluorescent analysis of 1, 6, 14-months control and  $\beta$ *Men1* pancreas. Insets  
10 represent higher magnifications. Note that while all ChromograninA<sup>+</sup>/Insulin<sup>+</sup> cells have  
11 lost Menin expression in  $\beta$ *Men* pancreas, most of the Chromogranin<sup>+</sup>/insulin<sup>-</sup> cells  
12 demonstrate this loss. The residual Menin staining seen in ChromograninA<sup>+</sup> cells (insets)  
13 correspond to the expression of Menin in non  $\beta$ -islet-cell lineages (*i.e.* Glucagon-,  
14 Somatostatin- and Pancreatic Polypeptide-expressing cells).

15

16 **Supplementary Figure 3.** Quantification of *Men1* invalidation in pancreatic islet  
17 lineages. Quantification of Menin disruption in  $\alpha$ - and  $\beta$ -cells. Representative picture of  
18 triple-Immunofluorescent analysis performed on pancreas sections from 1-month-old  
19  $\beta$ *Men1* and control mice. Right panels represent higher magnifications of dashed areas.  
20 Graph shows the percentage of  $\alpha$  or  $\beta$ -cells, expressing Menin or not. 3 mice per  
21 genotype were analyzed. For control mice, 743  $\beta$ -cells and 284  $\alpha$ -cells were counted and  
22 for  $\beta$ *Men1* mice, 3217  $\beta$ -cells and 308  $\alpha$ -cells. Data are represented as mean of mice  
23 percentage  $\pm$  SEM. \*\*\*: p<0.001; Student-t test.

24

25 **Supplementary Figure 4.** Validation of the ActivinB immunohistochemical staining  
26 obtained with 2 independent antibodies. Serial sections of 14-month-old mixed tumors  
27 and control pancreas were used to test the immunoreactivity of Abcam (ab56059) and  
28 Abnova (H00003625-D01P) commercial antibodies. Note the similar expression pattern  
29 seen for the tested antibodies in both control and tumor islet.

30

31 **Supplementary Figure 5.** Validation of ActivinB targeted disruption by  
32 immunohistochemistry within 14-months-old *InhβB-βMen1* tumors. Dashed lines  
33 delineate the islets location.

34 **SUPPLEMENTAL MATERIALS AND METHODS**

35 *List of used Primary antibodies:*

| Antigen       | Species    | Source                        | Dilution |          |         |
|---------------|------------|-------------------------------|----------|----------|---------|
|               |            |                               | IHC      | IF       | WB      |
| ActivinB      | Rabbit     | Abnova<br>(H00003625-D01P)    | 1/2000   | 1/2000*  | /       |
| ActivinB      | Rabbit     | Abcam (ab56059)               | 1/2000   | 1/2000*  | /       |
| ChromograninA | Rabbit     | Immunostar                    | 1/2000   | 1/100    | /       |
| Glucagon      | Rabbit     | Cell Signaling                | 1/750    | /        | /       |
| Glut2         | Rabbit     | Chemicon                      | /        | 1/200    | /       |
| Insulin       | Guinea-Pig | Dako                          | 1/5000   | 1/200    | /       |
| Ki67          | Goat       | Santa Cruz Biotech.           | /        | 1/1000*  | /       |
| MafA          | Rabbit     | Abcam                         | /        | 1/4000*  | 1/1000  |
| Ngn3          | Goat       | Beta Cell Biol.<br>Consortium | /        | 1/10000* | /       |
| Nkx2.2        | Mouse      | DHSB                          | /        | /        | 1/1000  |
| Nkx6.1        | Mouse      | DHSB                          | /        | 1/5000*  | 1/1000  |
| Pax4          | Rabbit     | Dr B. Sosa-Pineda             | /        | 1/30000* | 1/5000  |
| Pdx1          | Goat       | Abcam                         | /        | 1/500    | 1/10000 |
| PP            | Goat       | Imgenex                       | 1/500    | /        | /       |
| Somatostatin  | Goat       | Santa Cruz Biotech.           | 1/5000   | /        | /       |
| Sox9          | Rabbit     | Sigma Aldrich                 | /        | 1/500    | /       |

36 \* Combined with a Tyramide Signal Amplification (TSA system, Perkin-Elmer)

37

38

39

40

41

42 **List of used secondary antibodies:**

| Antigen                          | Species | Source                 | Dilution |
|----------------------------------|---------|------------------------|----------|
| Biotinylated anti-rabbit IgG     | Horse   | Vector                 | 1/200    |
| Biotinylated anti-goat IgG       | Horse   | Vector                 | 1/200    |
| Biotinylated anti-mouse IgG      | Goat    | Vector                 | 1/200    |
| Biotinylated anti-guinea-pig IgG | Goat    | Vector                 | 1/200    |
| Anti-Guinea Pig Alexa Fluor® 488 | Donkey  | Jackson Immunoresearch | 1/200    |
| Anti-Rabbit Alexa Fluor® 555     | Donkey  | Invitrogen             | 1/200    |

43

44

45 **Primer used for real-time quantitative RT-PCR:**

| Primers | Forward                              | Reverse                             |
|---------|--------------------------------------|-------------------------------------|
| Tbp     | 5'-TGG TGT GCA CAG GAG CCA AG-3'     | 5'-TTC ACA TCA CAG CTC CCC AC-3'    |
| Ins1    | 5'-AGG ACC CAC AAG TGG AAC AAC-3'    | 5'-GTG CAG CAC TGA TCC ACA ATG-3'   |
| Ins2    | 5'-GCT CTC TAC CTG GTG TGT GGG-3'    | 5'-CTC CAC CCA GCT CCA GTT GTG-3'   |
| Mafa    | 5'-TCA GCA AGG AGG AGG TCA TCC GA-3' | 5'-TGG CTC TGG AGC TGG CAC TTC T-3' |
| Mafb    | 5'-AGC AGG TGT GAC TCA CGA TG-3'     | 5'-AGA AGC GGT CCT CCA CAC TA-3'    |
| Scl2a2  | 5'-TTT GGT GGG TGG CTC GGG GA-34     | 5'-GGG CGT GTG CCG GTC CAA AT-3'    |
| Nkx6.1  | 5'-ACT TGG CAG GAC CAG AGA GA-3'     | 5'-AGA GTT CGG GTC CAG AGG TT-3'    |
| Nkx2.2  | 5'-TTG TCA TTG TCC GGT GAC TC-3'     | 5'-TCT ACG ACA GCA GCG ACA AC-3'    |
| Pdx1    | 5'-AGG TGC TTA CAC AGC GGA AC-3'     | 5'-GGG TCC CGC TAC TAC GTT TC-3'    |
| Pax4    | 5'-TGG ACA CCC GAC AGC ACA T-3'      | 5'-CTT AAG GCT CCG TGA GAT GTC A-3' |

46
