# Supplementary material
Source: PubMed Central journal article supplement (PMC4760219)

Control

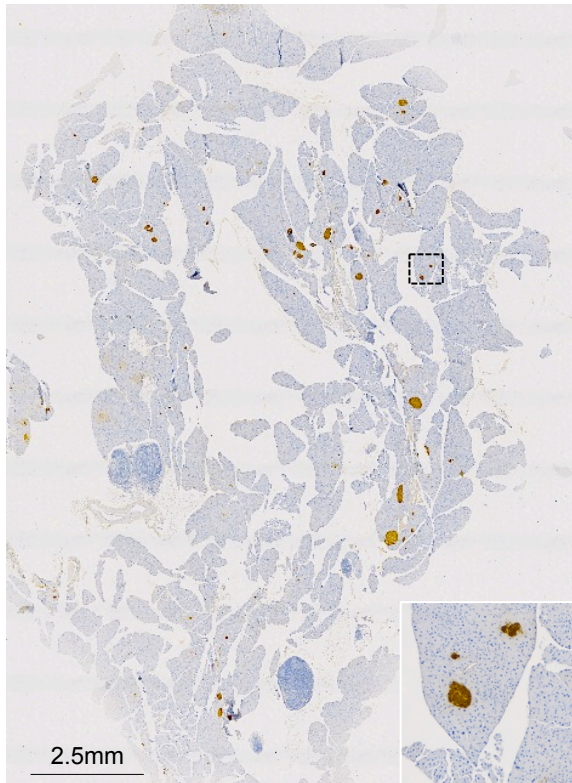

$\beta$ Men1

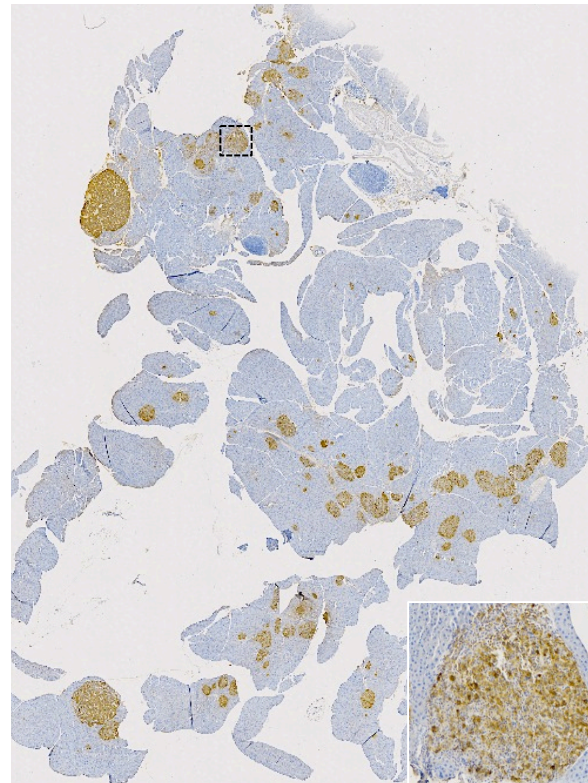

Inh $\beta$ B- $\beta$ Men1

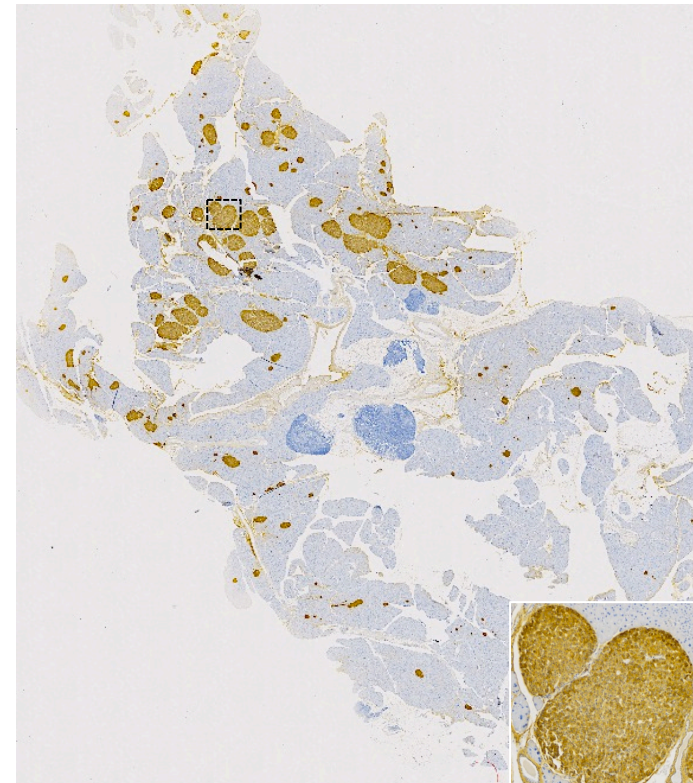

Supplement: MCB.00930-15_zmb999101133so2.pdf [file MCB.00930-15_zmb999101133so2.pdf]

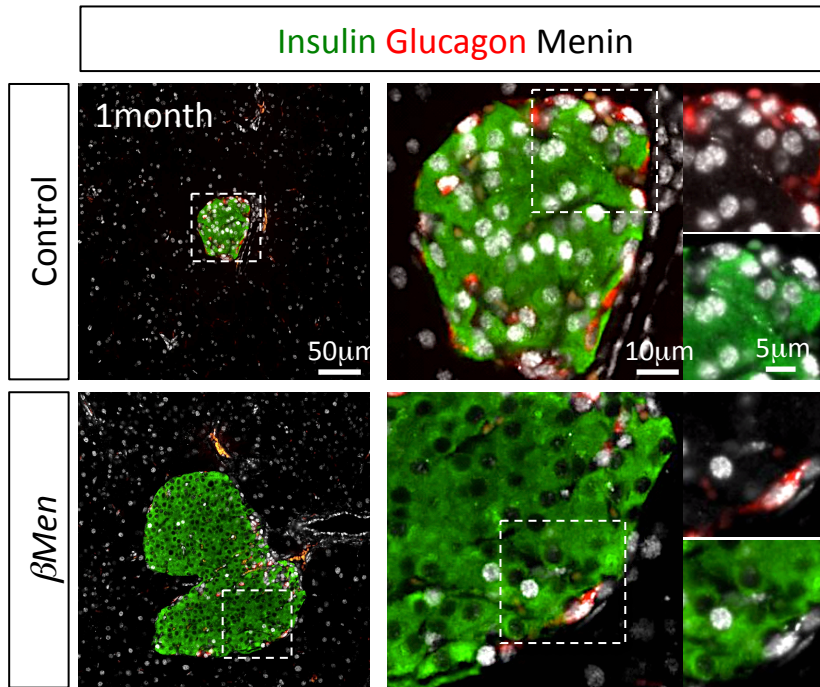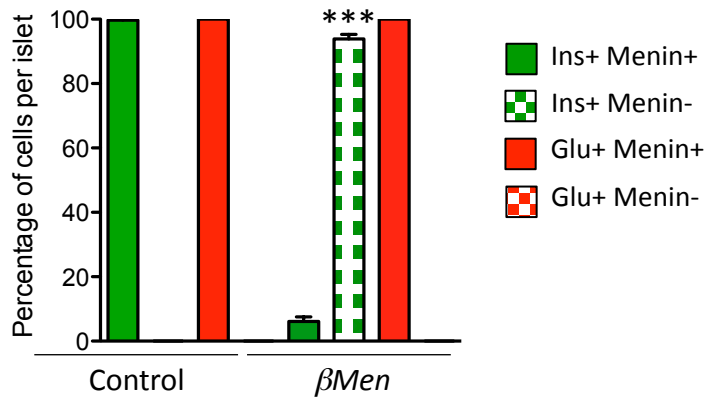

Supplement: MCB.00930-15_zmb999101133so3.pdf [file MCB.00930-15_zmb999101133so3.pdf]

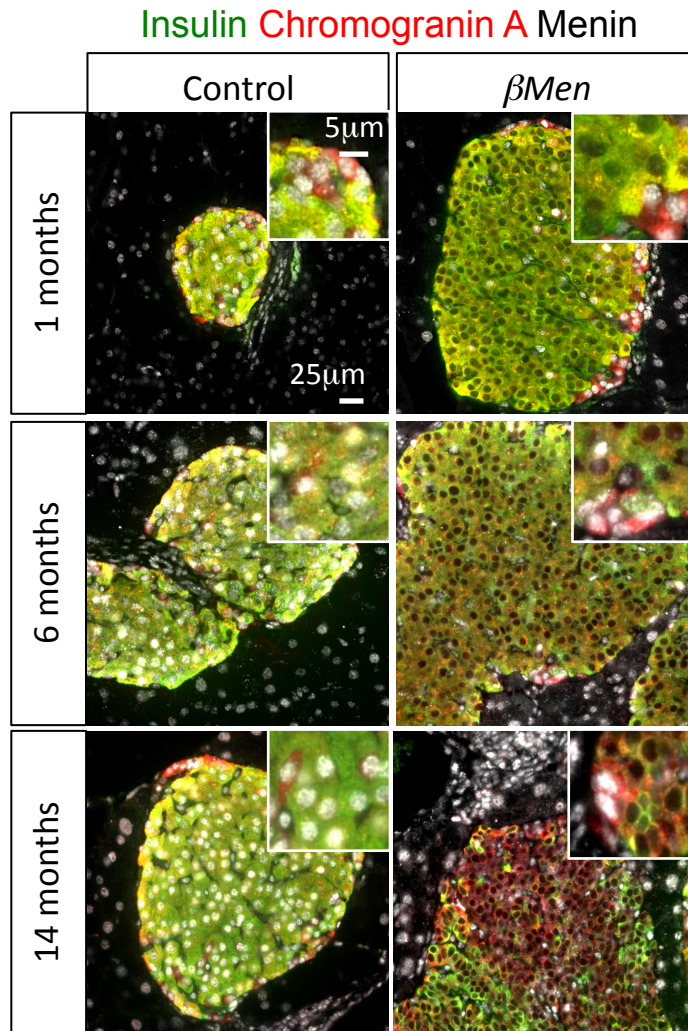

Supplement: MCB.00930-15_zmb999101133so4.pdf [file MCB.00930-15_zmb999101133so4.pdf]

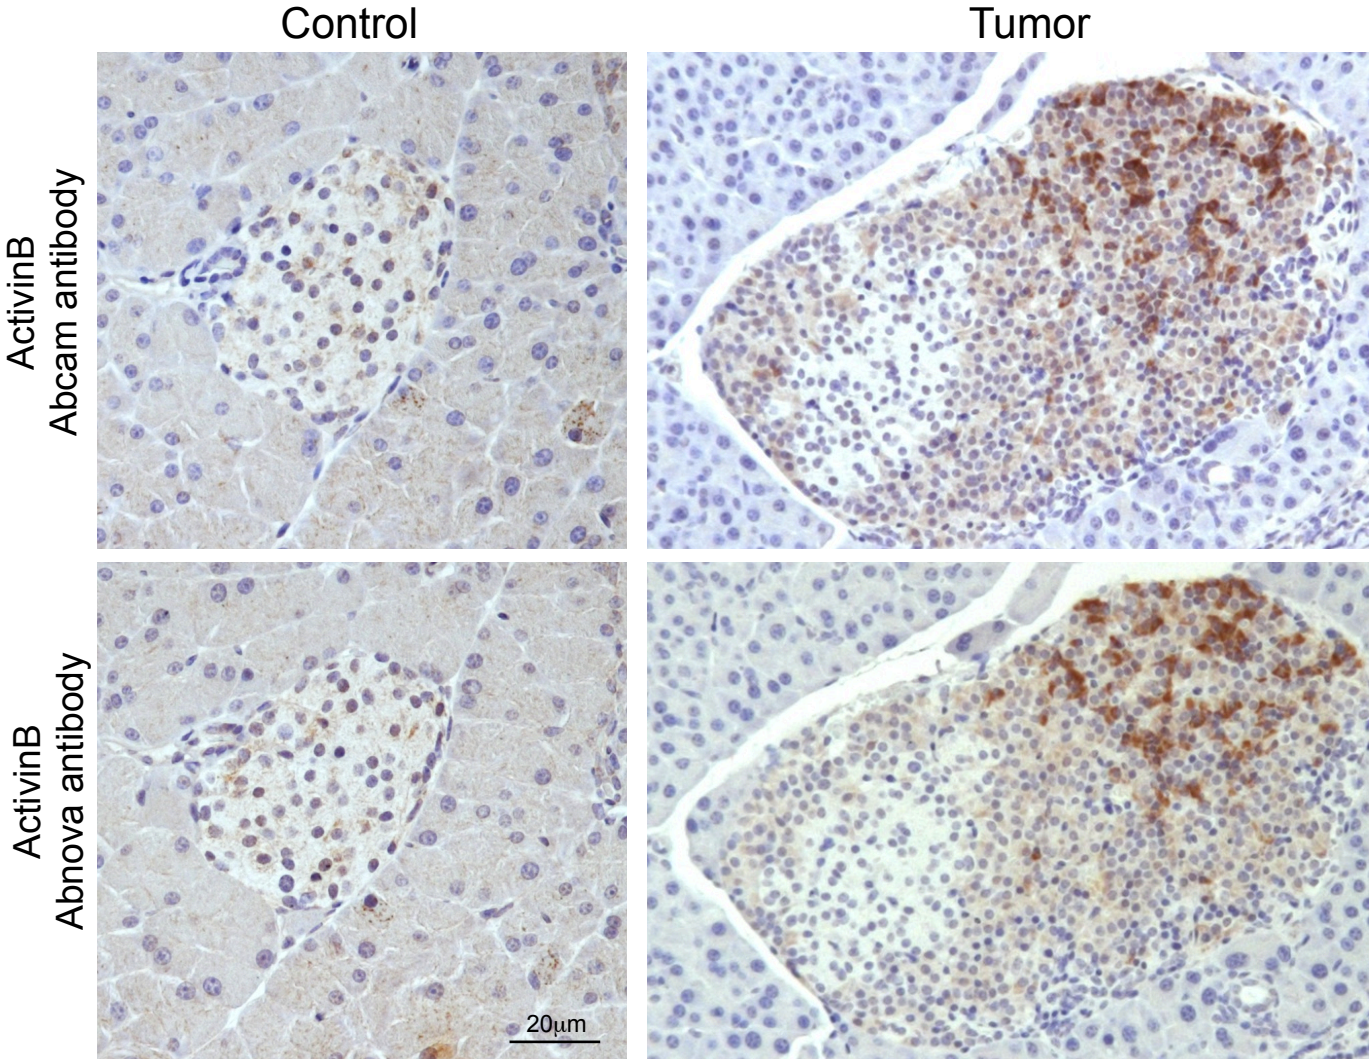

Supplement: MCB.00930-15_zmb999101133so5.pdf [file MCB.00930-15_zmb999101133so5.pdf]

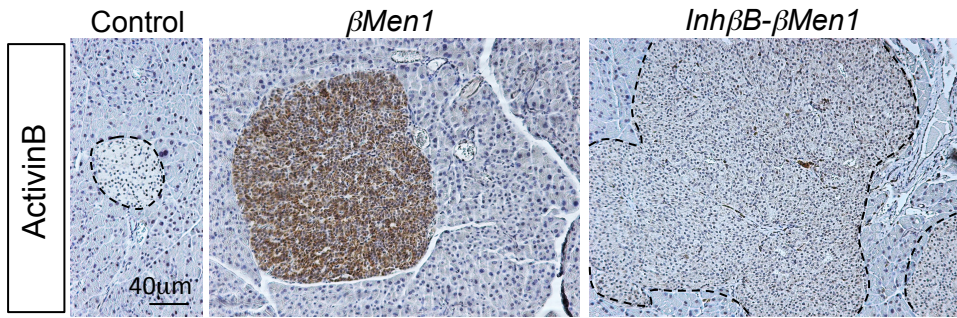

Supplement: MCB.00930-15_zmb999101133so6.pdf [file MCB.00930-15_zmb999101133so6.pdf]
